# Supplementary material for: Insights from the draft genome of the subsection V (Stigonematales) cyanobacterium Hapalosiphon sp. Strain MRB220 associated with 2-MIB production
Source: PubMed Central journal article supplement (PMC5009524; doi:10.1186/s40793-016-0175-5), 2016-09-02

Consensus

Sequence Logo

Identity

- 1. Calothrix sp. PCC 7507
- 2. Fischerella muscicola
- 3. Fischerella muscicola SAG 1427-1 : UYGDRAFT\_AJLJ01000065\_1.65
- 4. Fischerella sp. PCC 9431 : Fis9431DRAFT\_Scaffold1.2
- 5. Hapalosiphon welwitschii UH strain IC-52-3 : IC523\_scaffold8.8
- 6. Westiella intricata UH strain HT-29-1 : HT291\_Scaffold23.23
- 7. MRB220

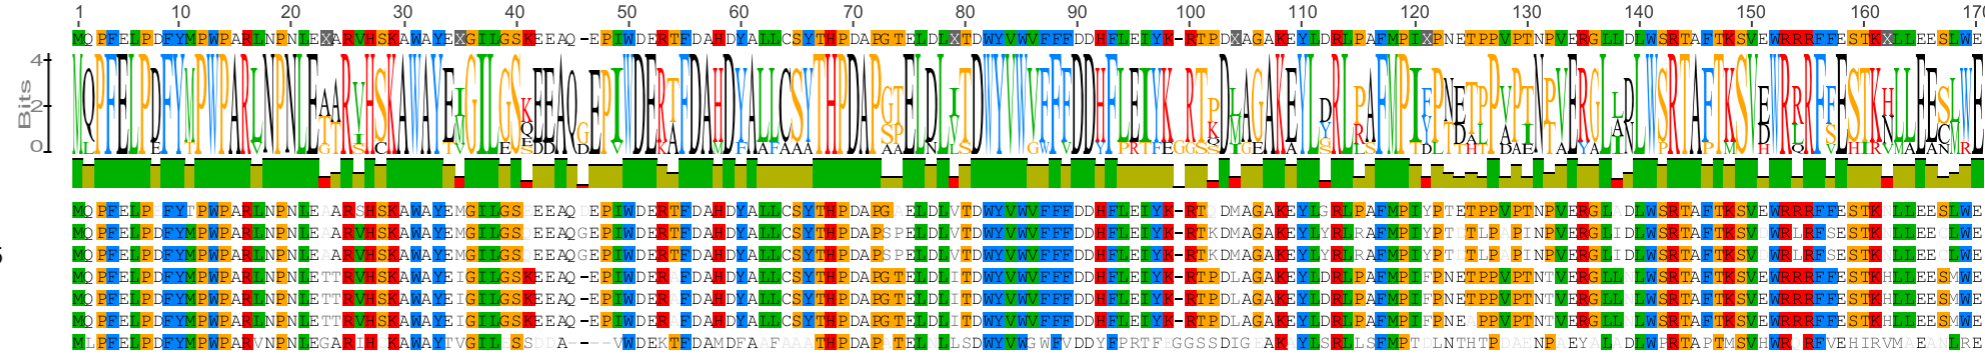

Consensus

Sequence Logo

Identity

- 1. Calothrix sp. PCC 7507
- 2. Fischerella muscicola
- 3. Fischerella muscicola SAG 1427-1 : UYGDRAFT\_AJLJ01000065\_1.65
- 4. Fischerella sp. PCC 9431 : Fis9431DRAFT\_Scaffold1.2
- 5. Hapalosiphon welwitschii UH strain IC-52-3 : IC523\_scaffold8.8
- 6. Westiella intricata UH strain HT-29-1 : HT291\_Scaffold23.23
- 7. MRB220

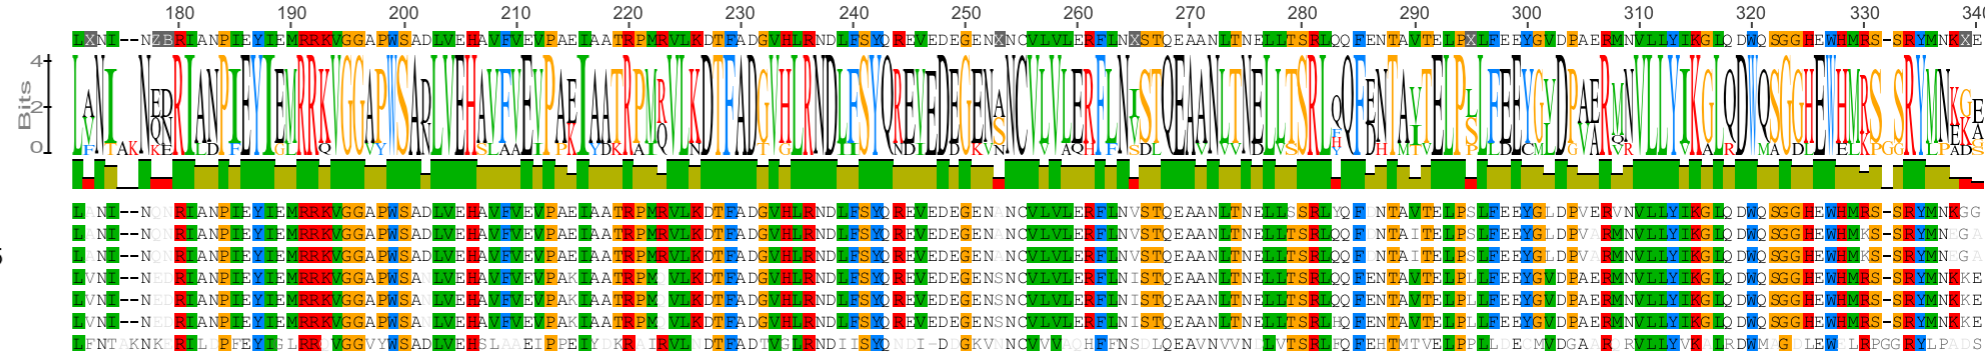

Consensus

Sequence Logo

Identity

- 1. Calothrix sp. PCC 7507
- 2. Fischerella muscicola
- 3. Fischerella muscicola SAG 1427-1 : UYGDRAFT\_AJLJ01000065\_1.65
- 4. Fischerella sp. PCC 9431 : Fis9431DRAFT\_Scaffold1.2
- 5. Hapalosiphon welwitschii UH strain IC-52-3 : IC523\_scaffold8.8
- 6. Westiella intricata UH strain HT-29-1 : HT291\_Scaffold23.23
- 7. MRB220

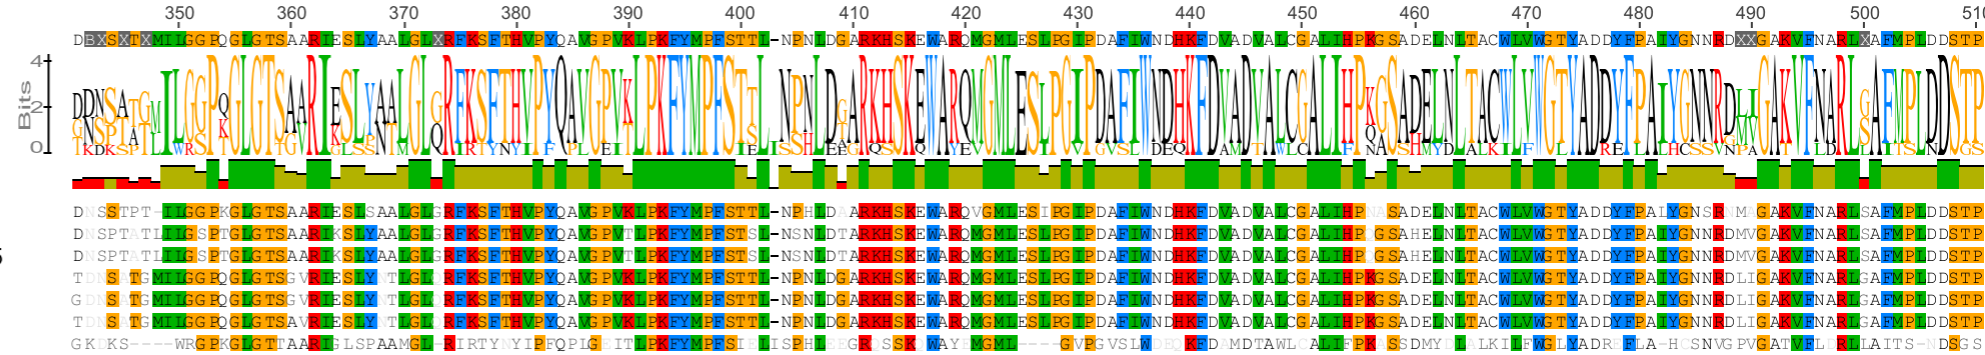

Consensus

Sequence Logo

Identity

- 1. Calothrix sp. PCC 7507
- 2. Fischerella muscicola
- 3. Fischerella muscicola SAG 1427-1 : UYGDRAFT\_AJLJ01000065\_1.65
- 4. Fischerella sp. PCC 9431 : Fis9431DRAFT\_Scaffold1.2
- 5. Hapalosiphon welwitschii UH strain IC-52-3 : IC523\_scaffold8.8
- 6. Westiella intricata UH strain HT-29-1 : HT291\_Scaffold23.23
- 7. MRB220

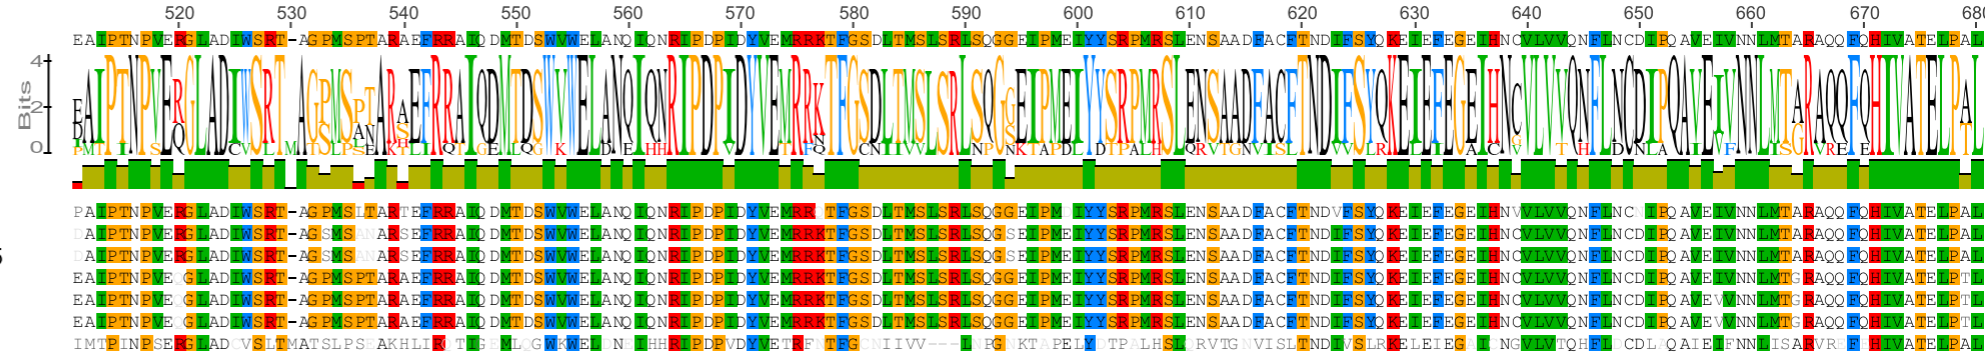

Consensus

Sequence Logo

Identity

- 1. Calothrix sp. PCC 7507
- 2. Fischerella muscicola
- 3. Fischerella muscicola SAG 1427-1 : UYGDRAFT\_AJLJ01000065\_1.65
- 4. Fischerella sp. PCC 9431 : Fis9431DRAFT\_Scaffold1.2
- 5. Hapalosiphon welwitschii UH strain IC-52-3 : IC523\_scaffold8.8
- 6. Westiella intricata UH strain HT-29-1 : HT291\_Scaffold23.23
- 7. MRB220

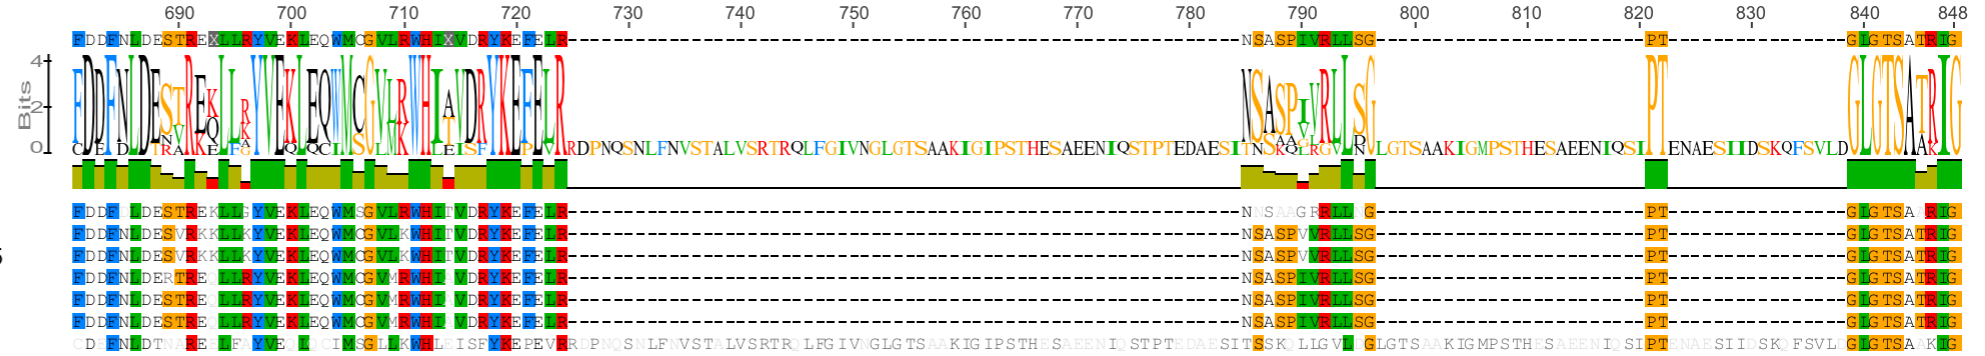

Supplement: 40793_2016_175_MOESM4_ESM.pdf [file 40793_2016_175_MOESM4_ESM.pdf]
