# Supplementary material for: Insights from the draft genome of the subsection V (Stigonematales) cyanobacterium Hapalosiphon sp. Strain MRB220 associated with 2-MIB production
Source: PubMed Central journal article supplement (PMC5009524; doi:10.1186/s40793-016-0175-5), 2016-09-02
Supplement: 40793_2016_175_MOESM2_ESM.pdf [file 40793_2016_175_MOESM2_ESM.pdf]

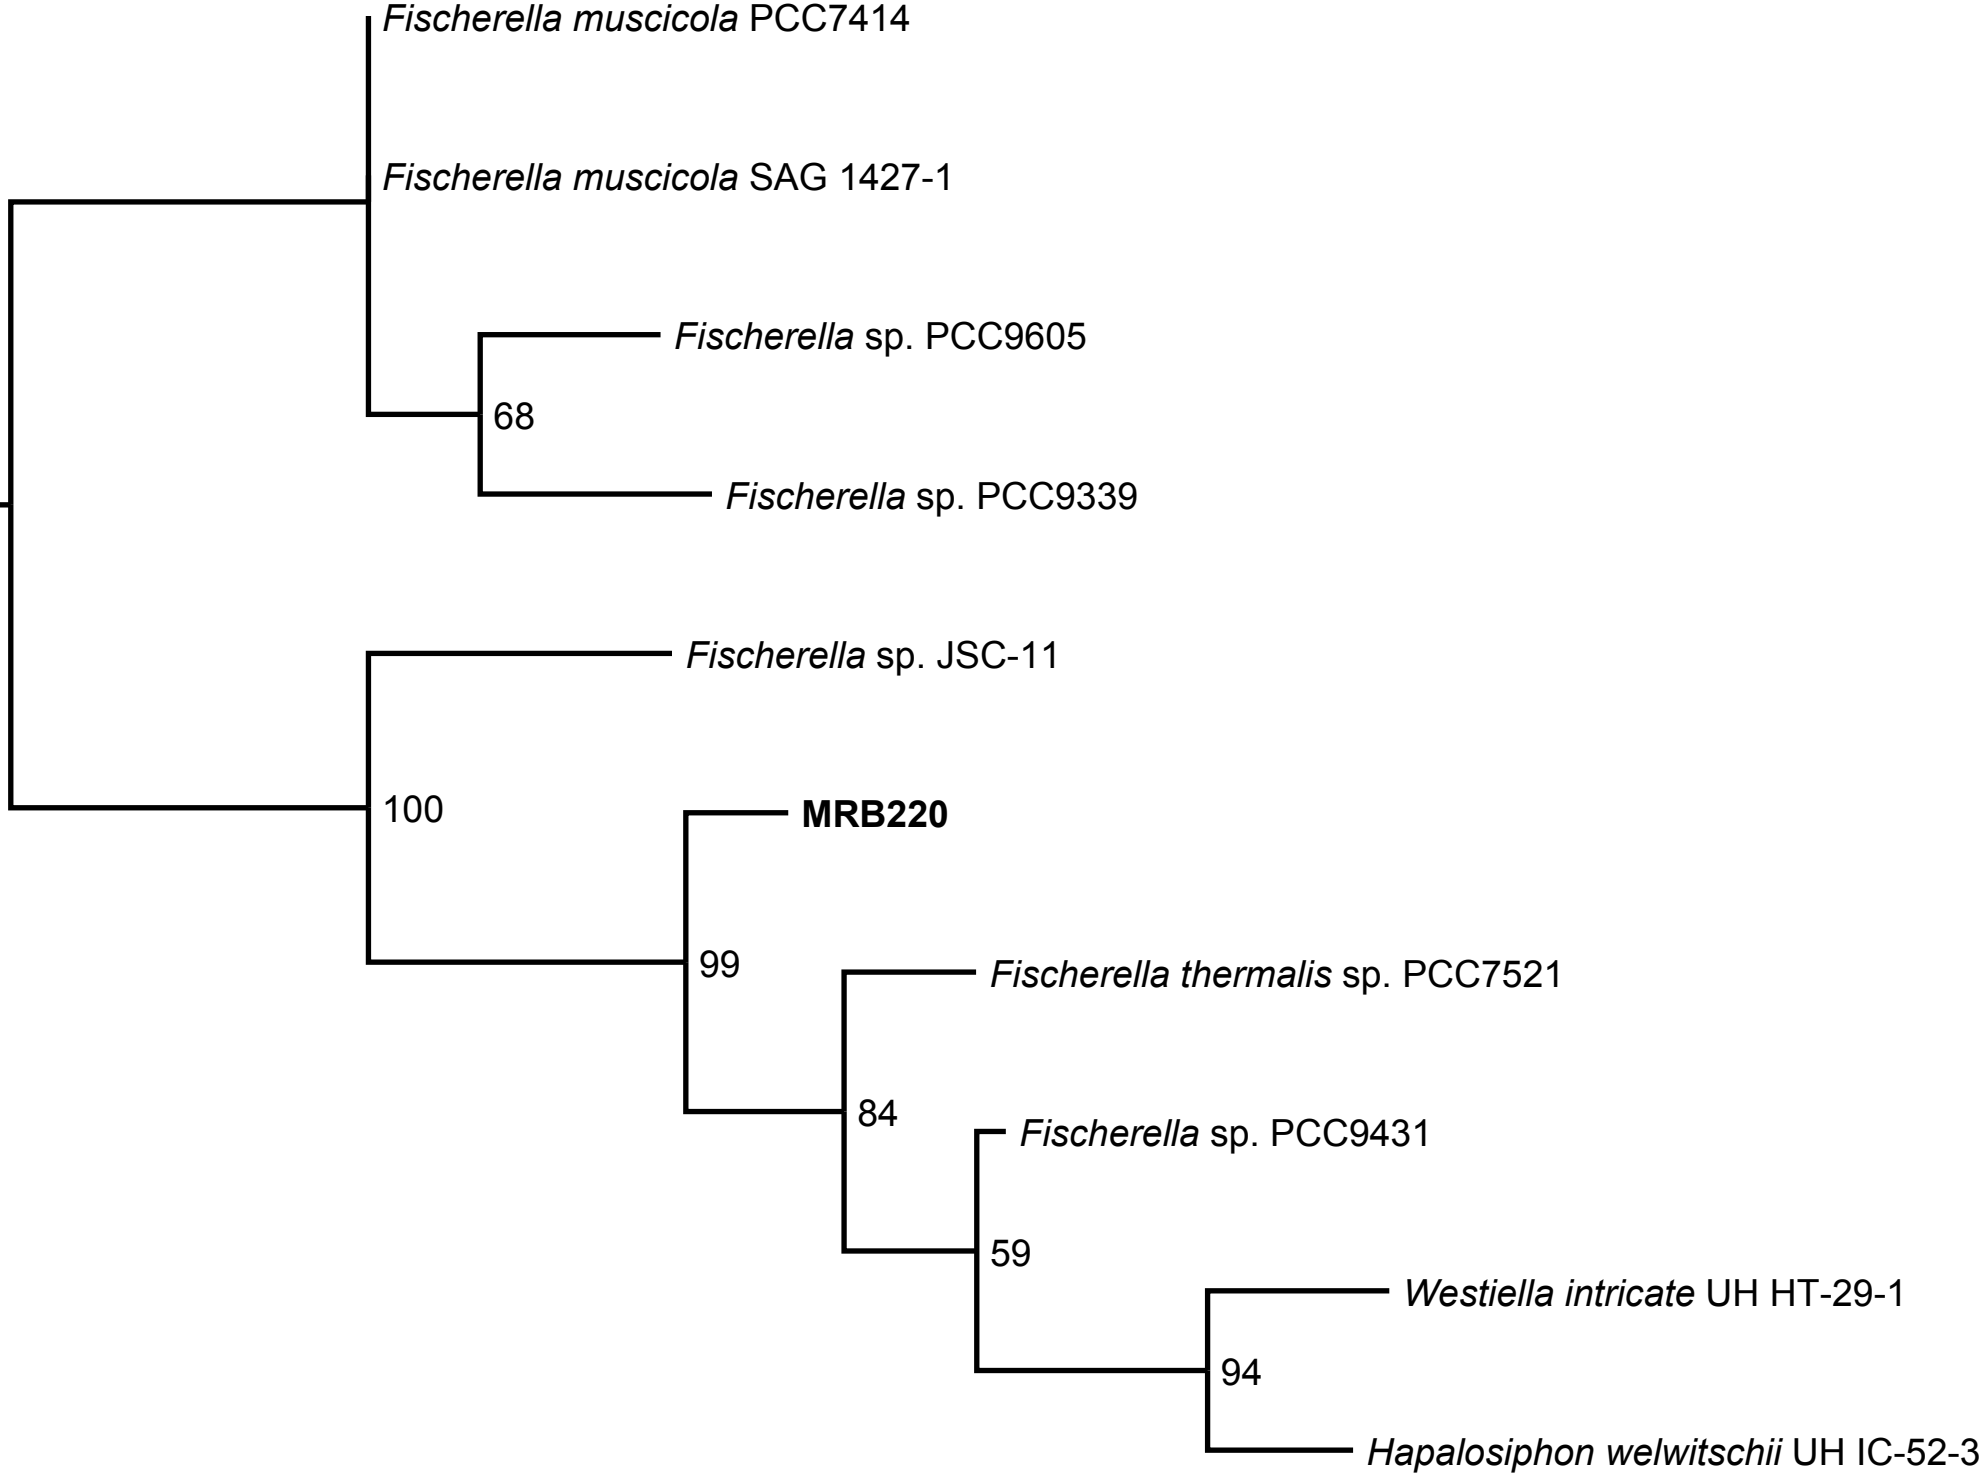

0.2
